# Supplementary material for: miR-125b-5p upregulation by TRIM28 induces cisplatin resistance in non-small cell lung cancer through CREB1 inhibition
Source: PubMed Central journal article supplement (PMC9730690; doi:10.1186/s12890-022-02272-9), 2022-12-07

**Figure 3C. Expression of CREB1 were detected by western blot for three repeats**

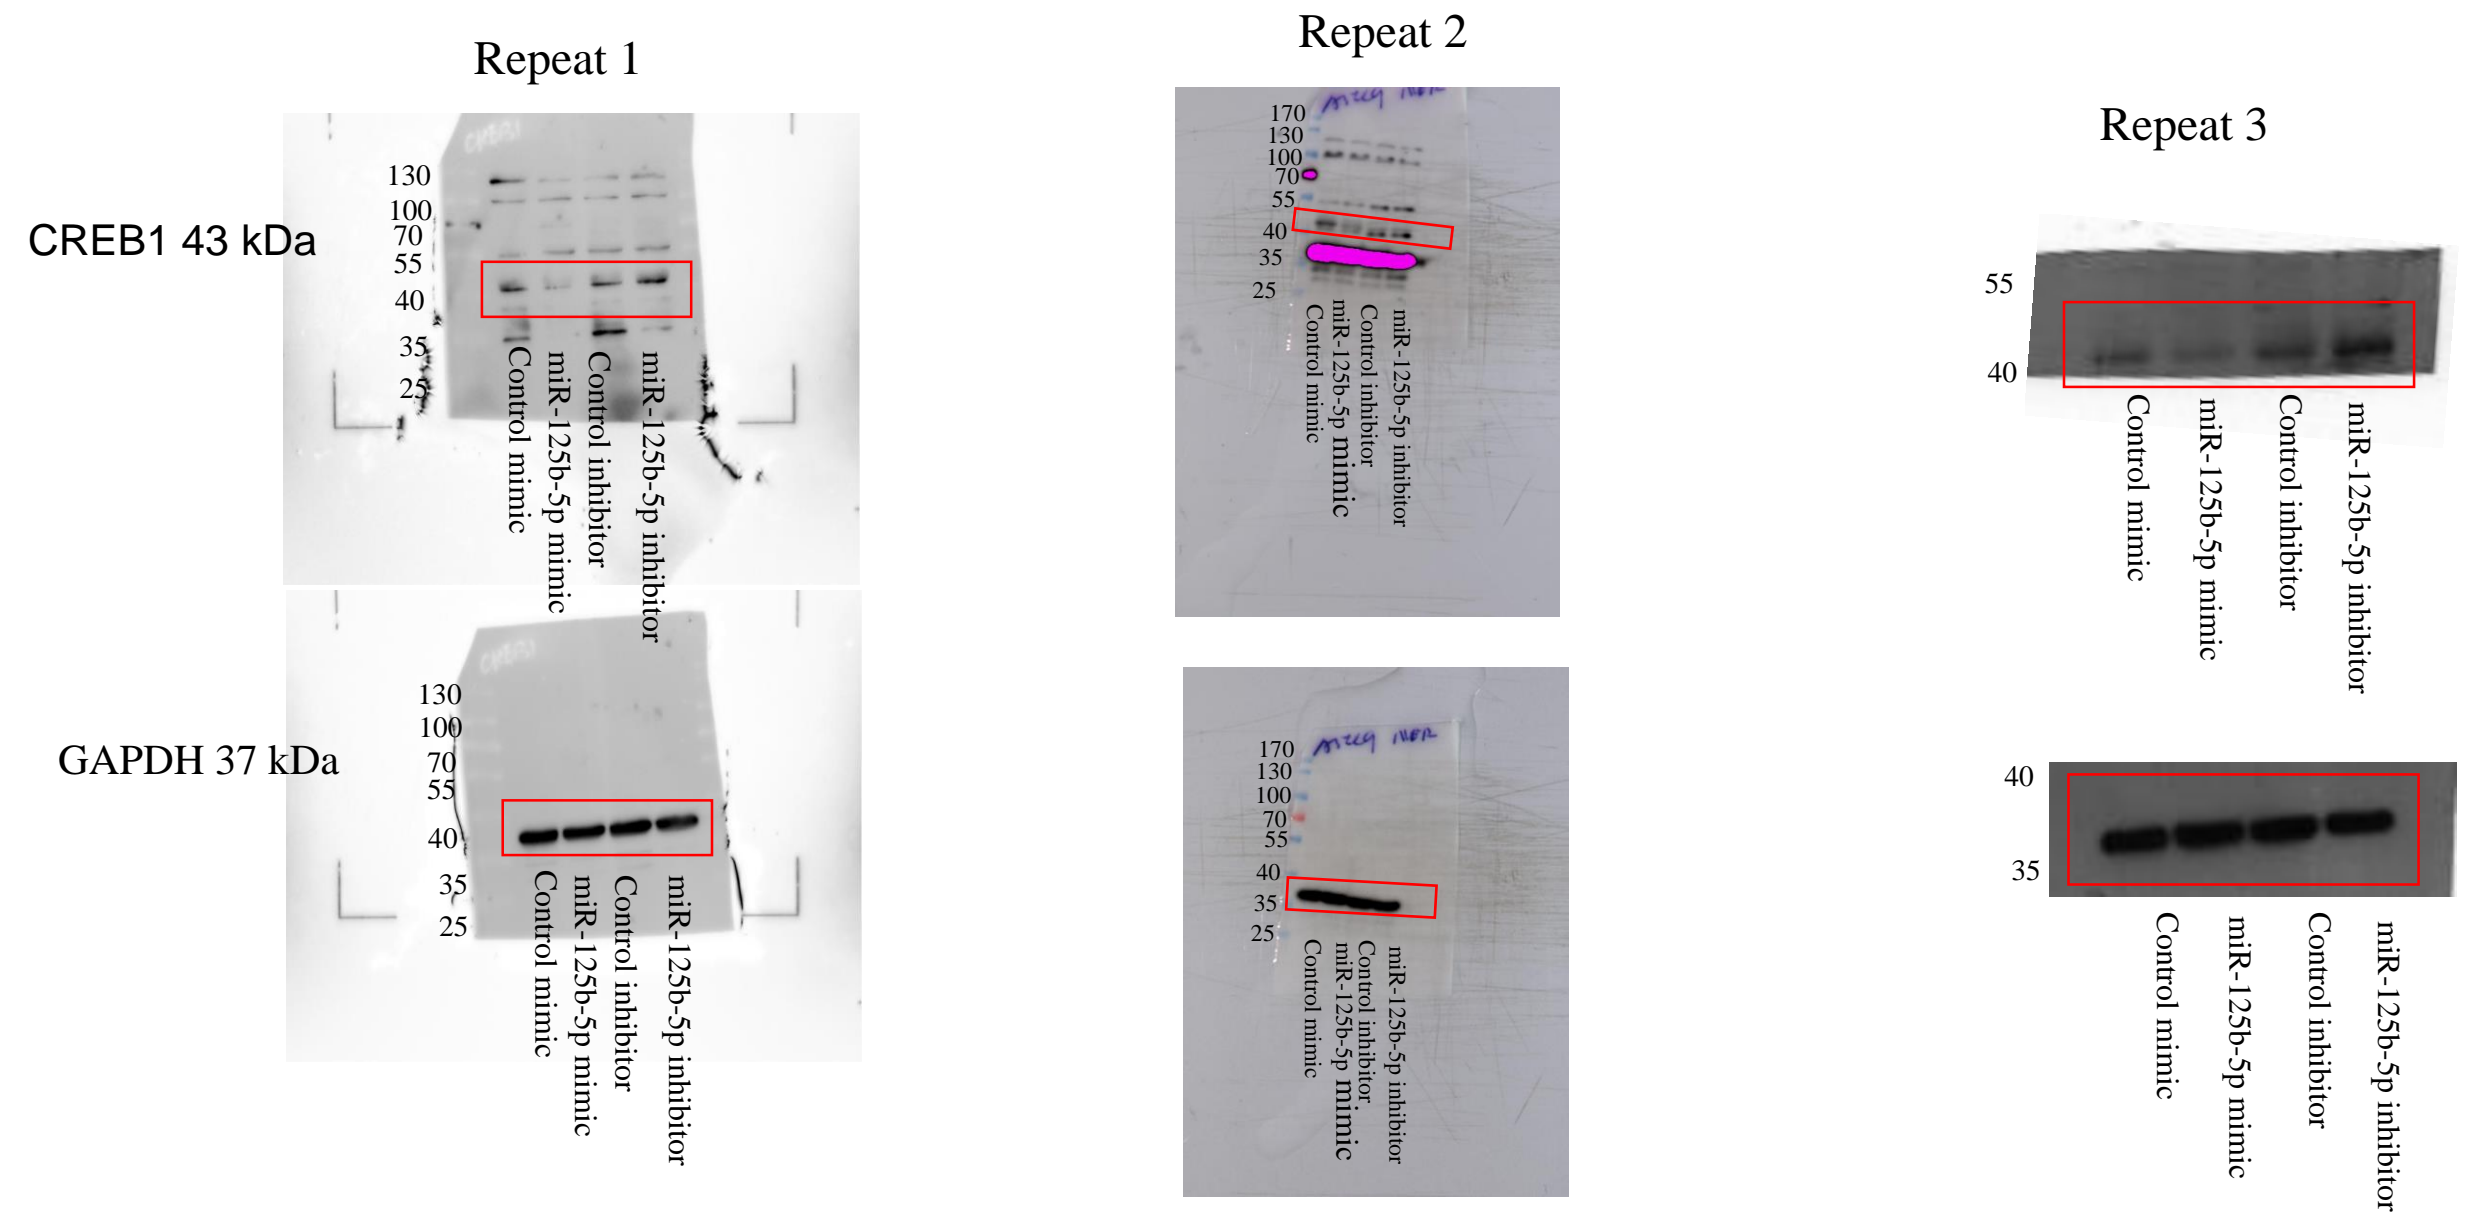

**Figure 3G. Expressions of CREB1 were detected by western blot for three repeats**

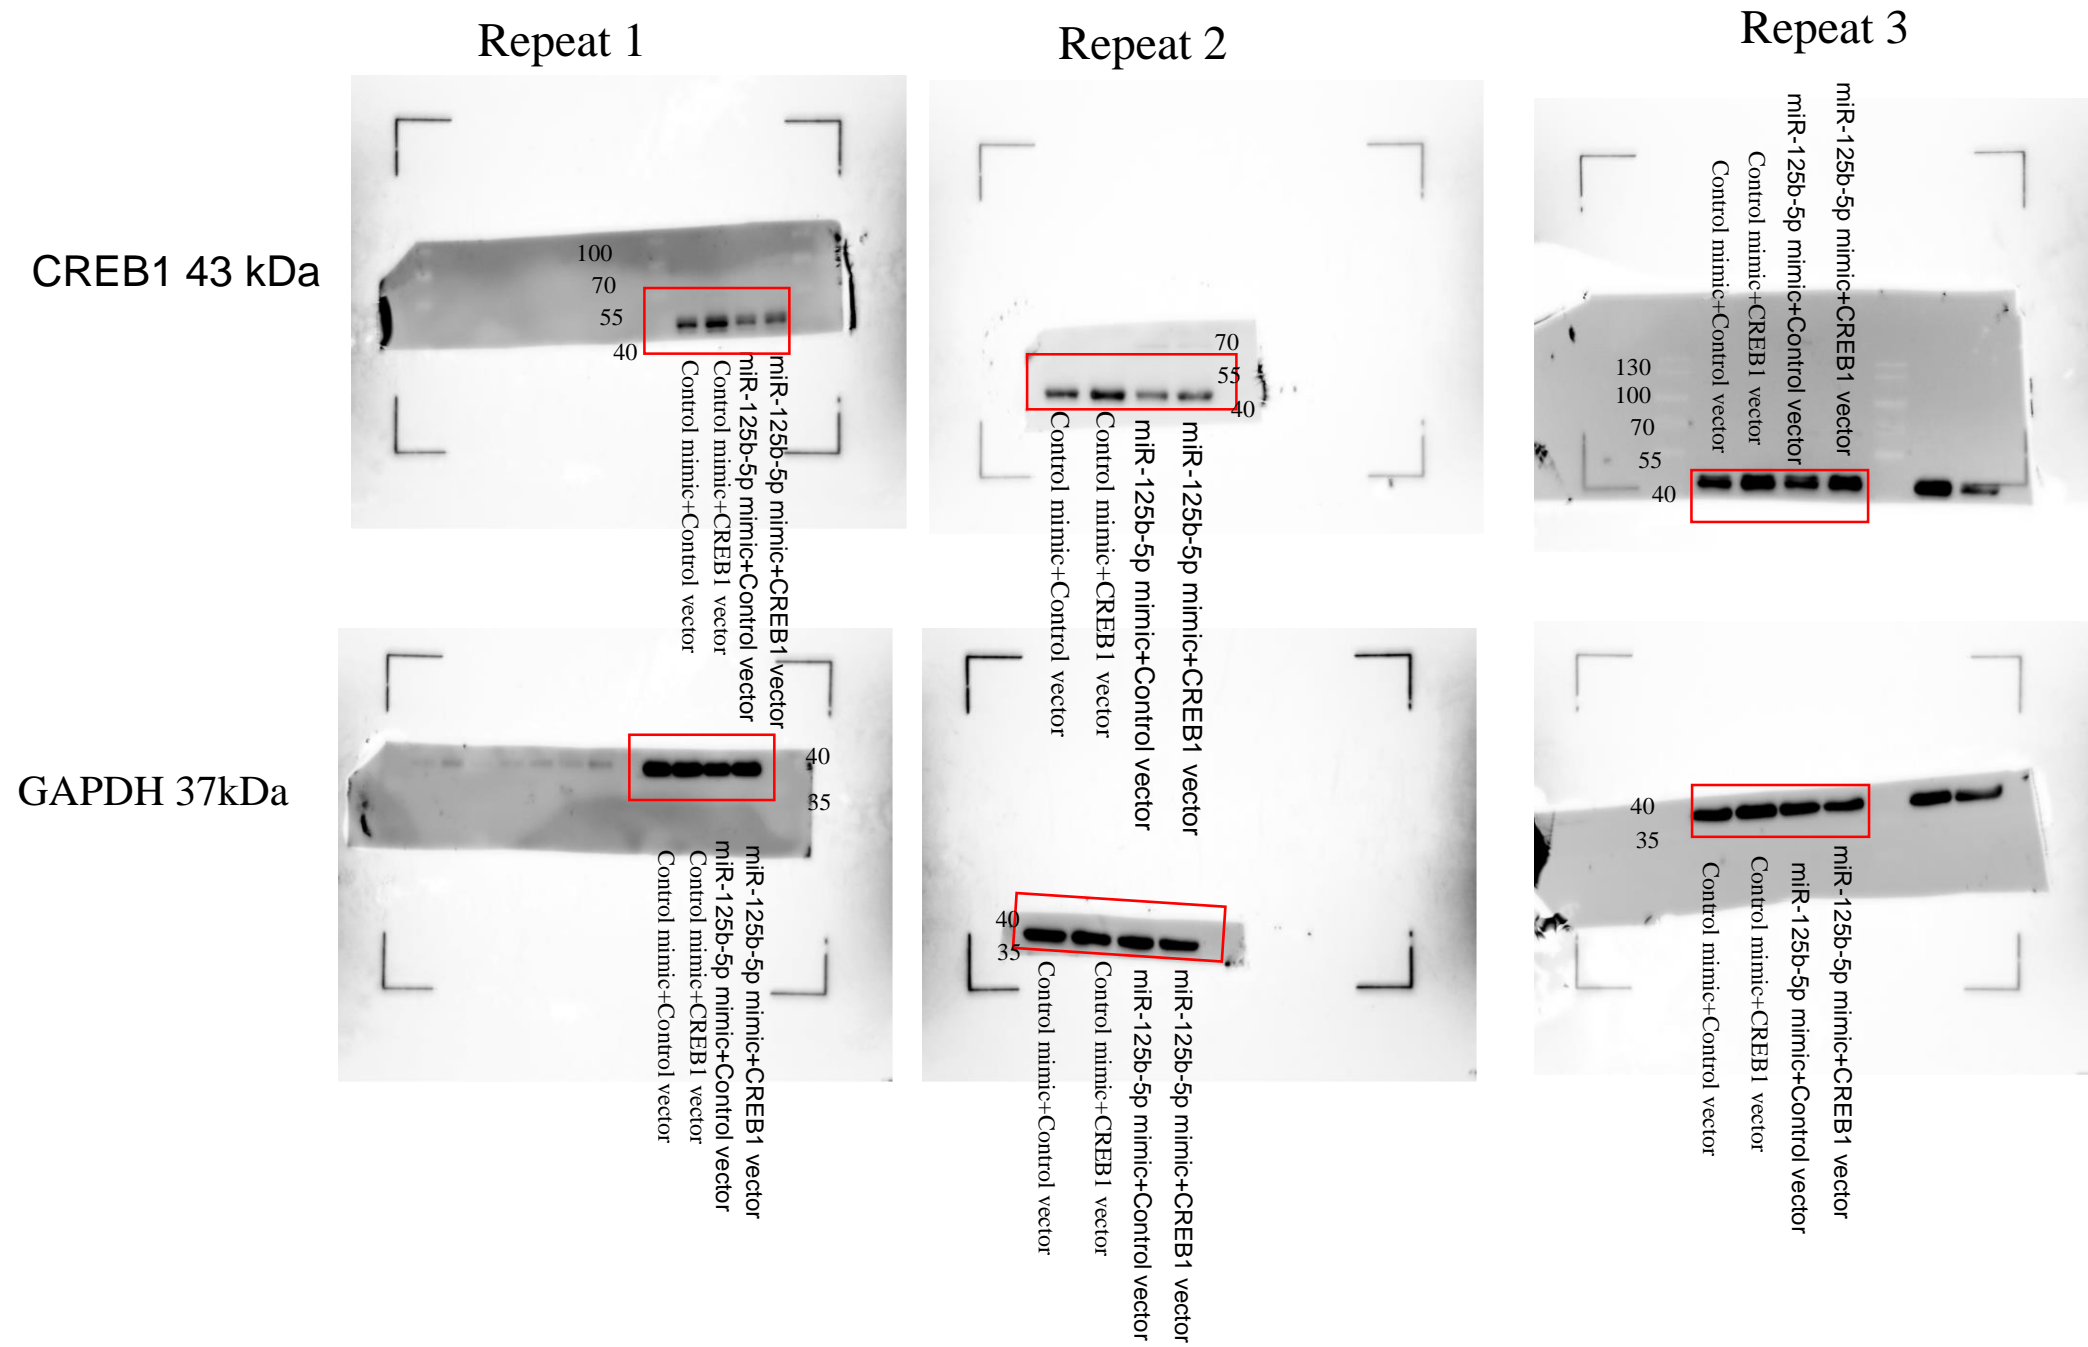

**Figure 4D. Expression of CREB1 were detected by western blot for three repeats**

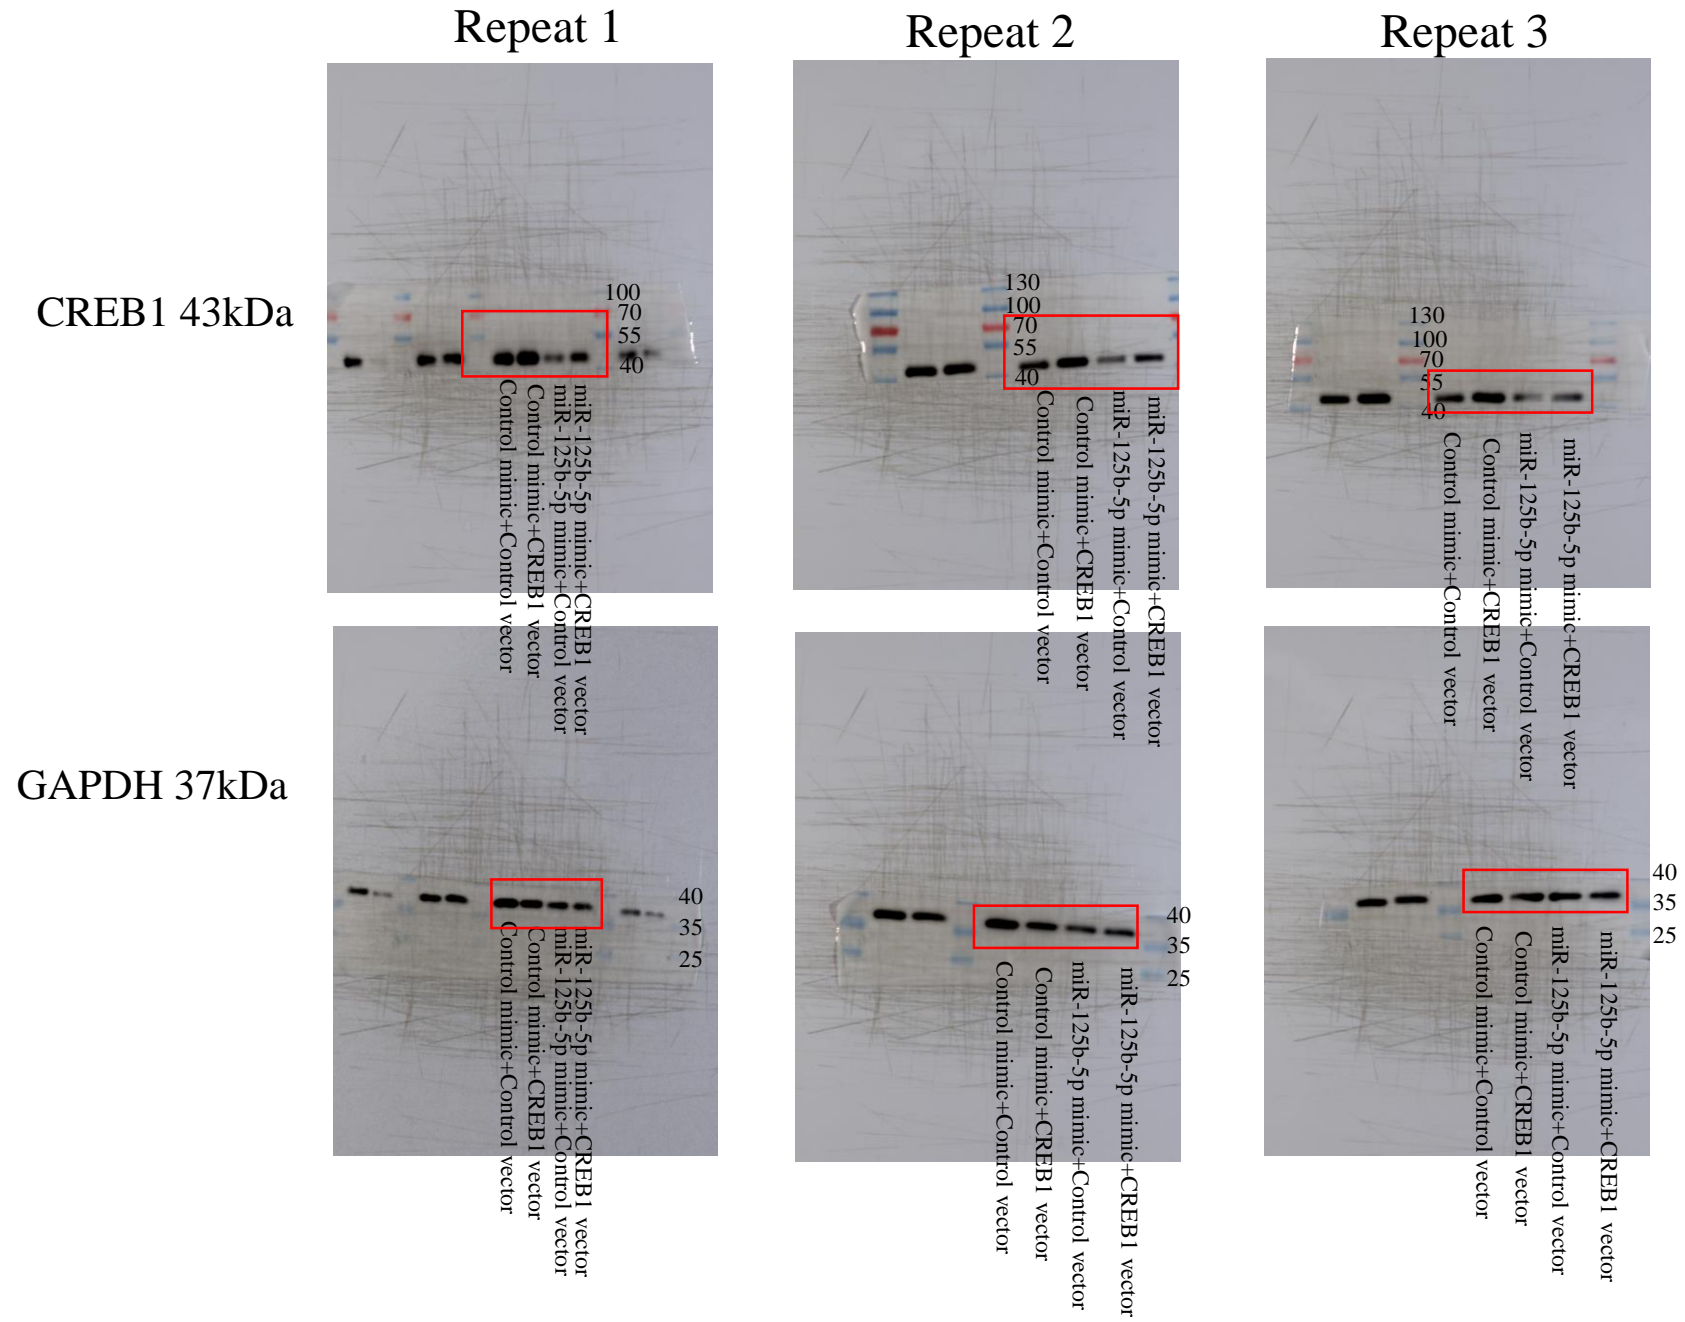

**Figure 5D. Expressions of CREB1 were detected by western blot for three repeats**

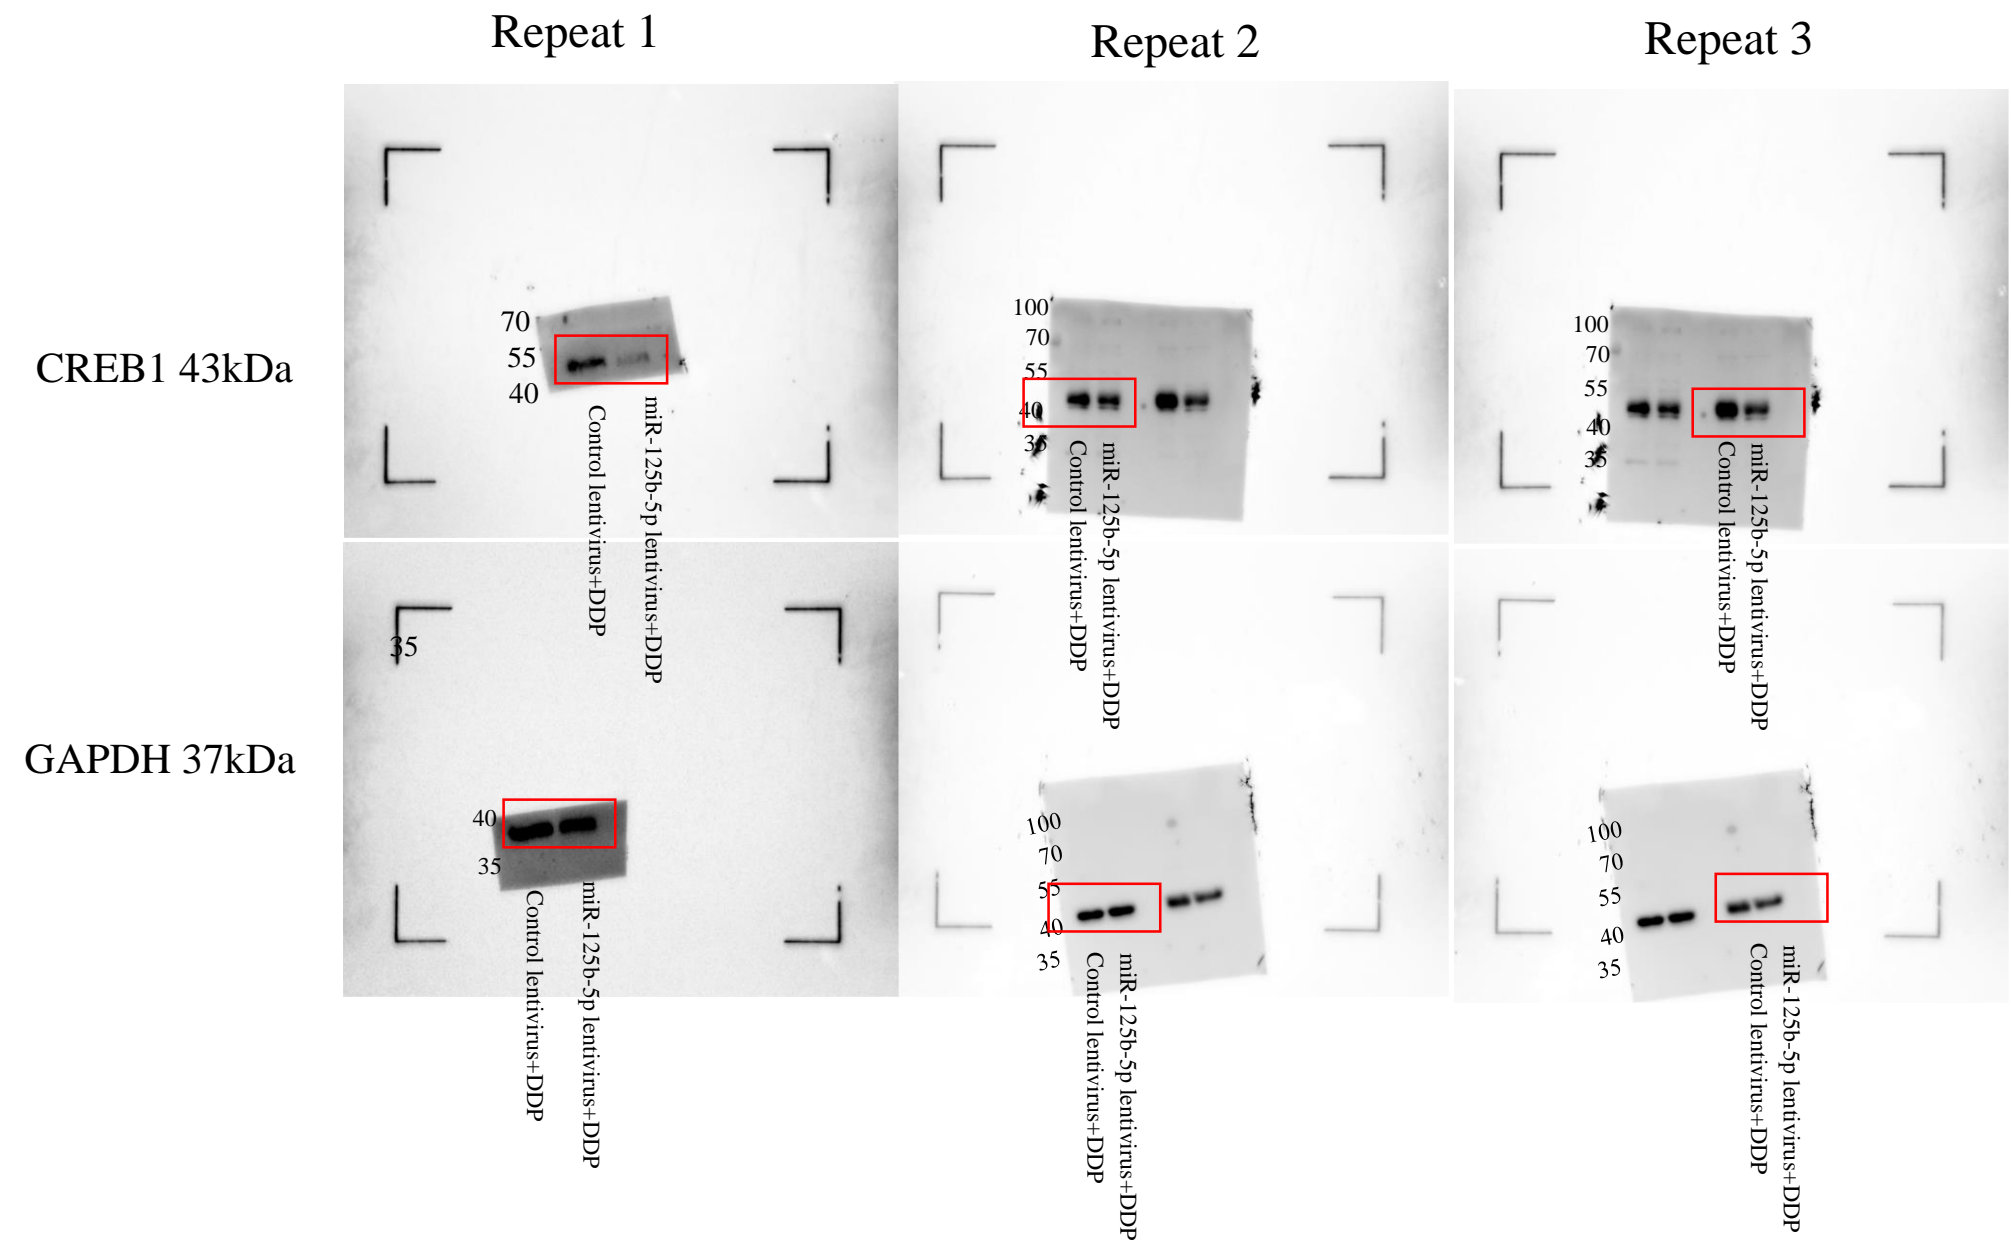

**Figure 6C. Expressions of TRIM 28 and CREB1 were detected by western blot for three repeats**

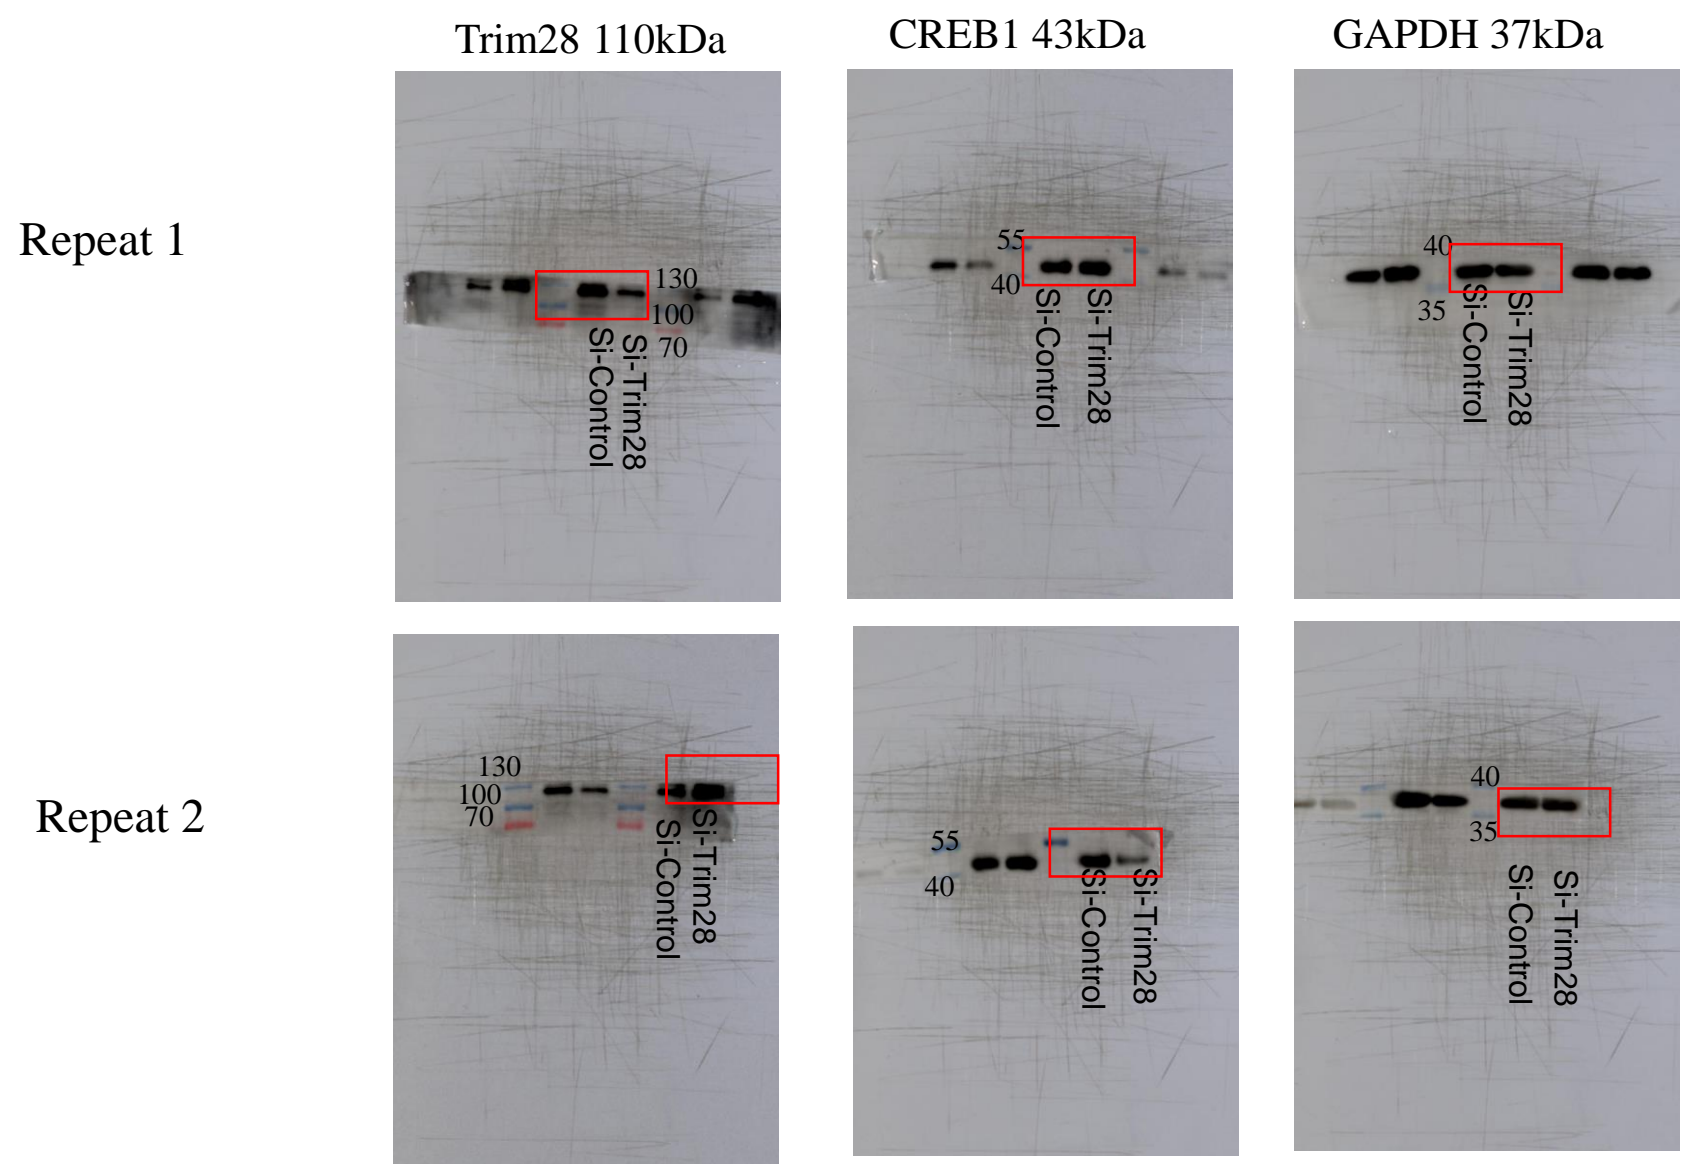

**Figure 6C. Expressions of TRIM 28 and CREB1 were detected by western blot for three repeats**

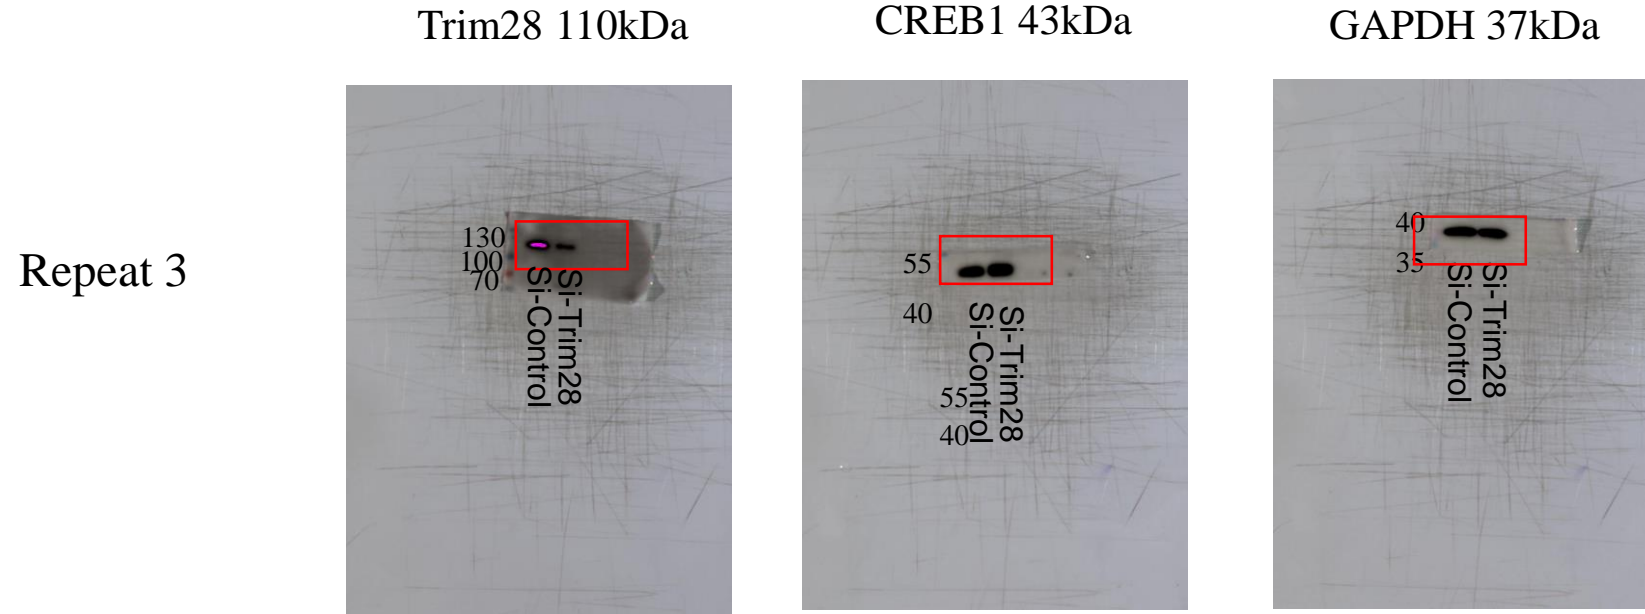

**Figure 6E. Expressions of TRIM 28 and CREB1 were detected by western blot for three repeats**

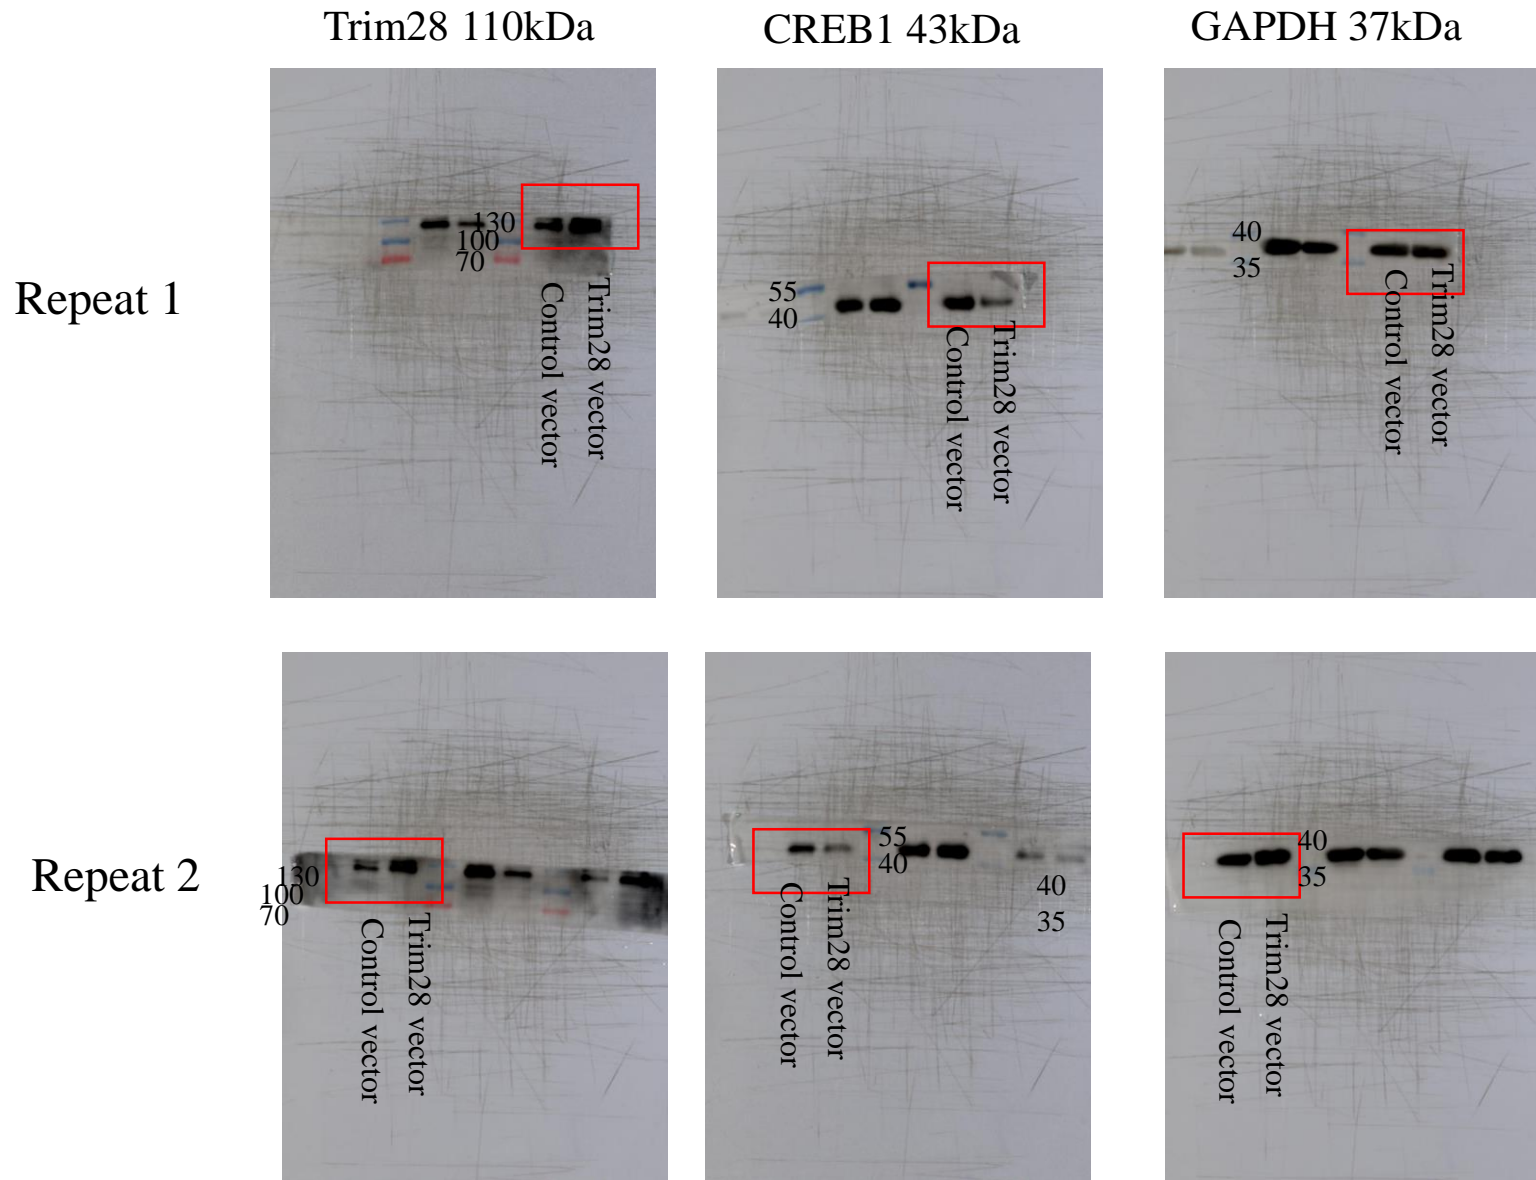

**Figure 6E. Expressions of TRIM 28 and CREB1 were detected by western blot for three repeats**

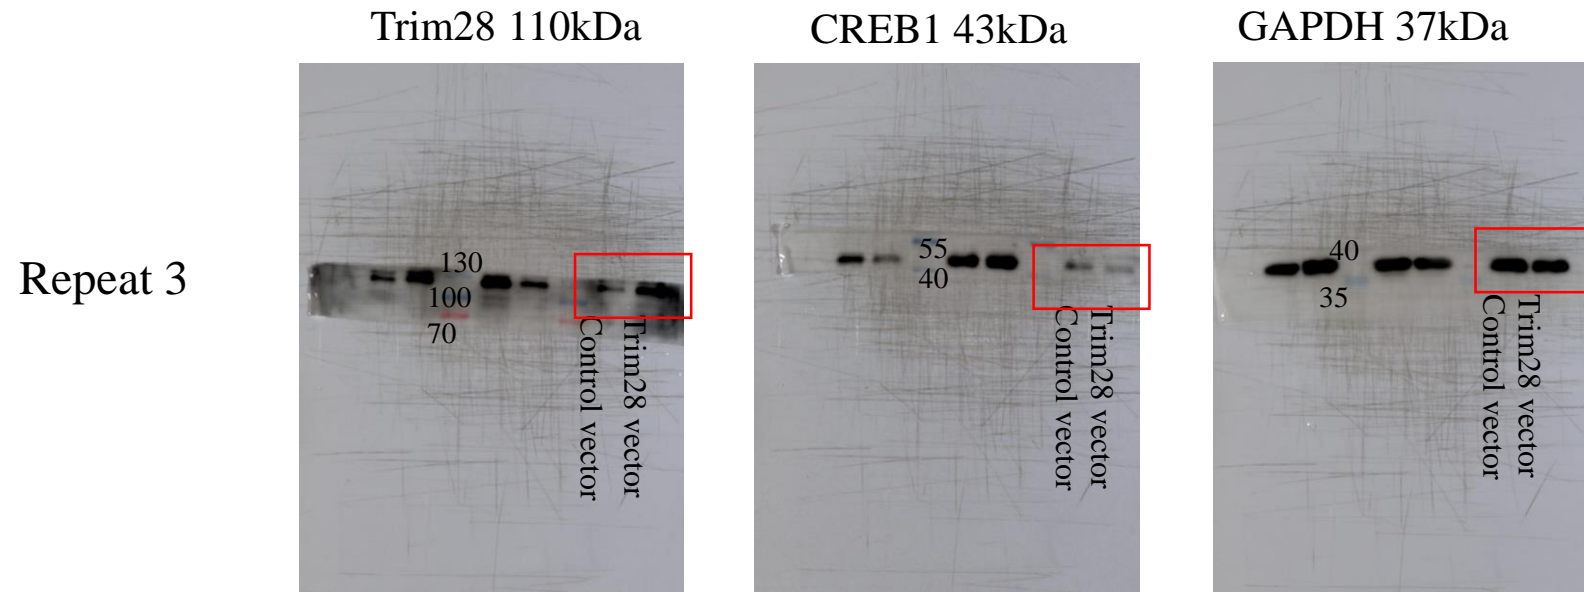



**Figure S1A. Expressions of CREB1 were detected by western blot for three repeats**

Repeat 1

Repeat 2

Repeat 3

CREB1 43kDa

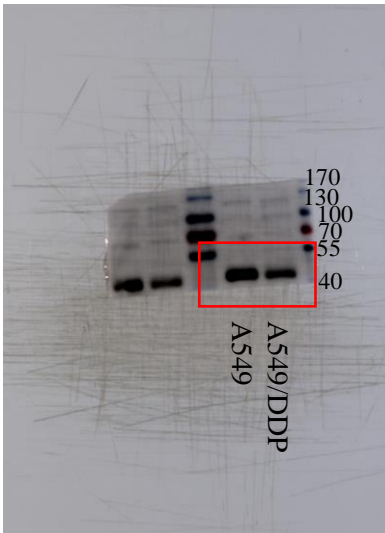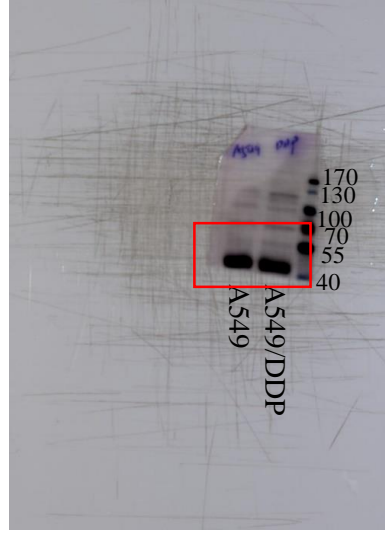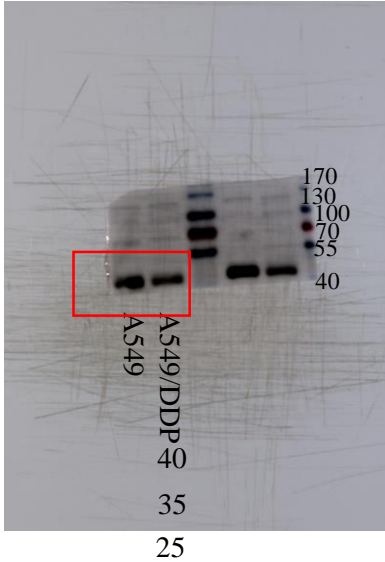

GAPDH 37kDa

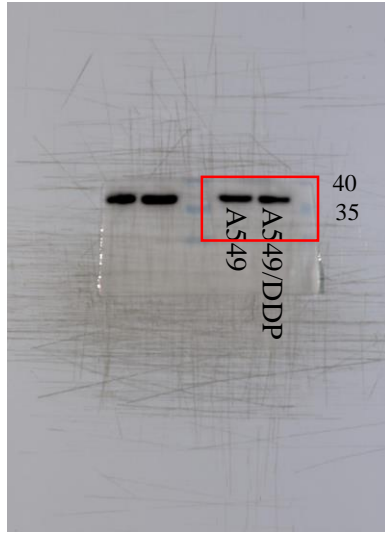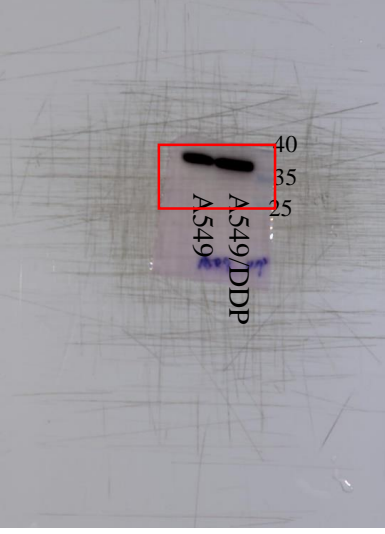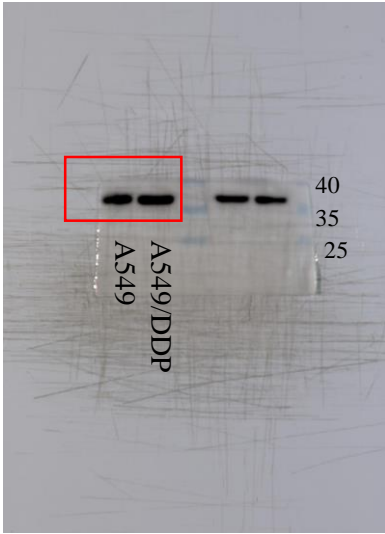

**Figure S1C. Expression of CREB1 were detected by western blot for three repeats**

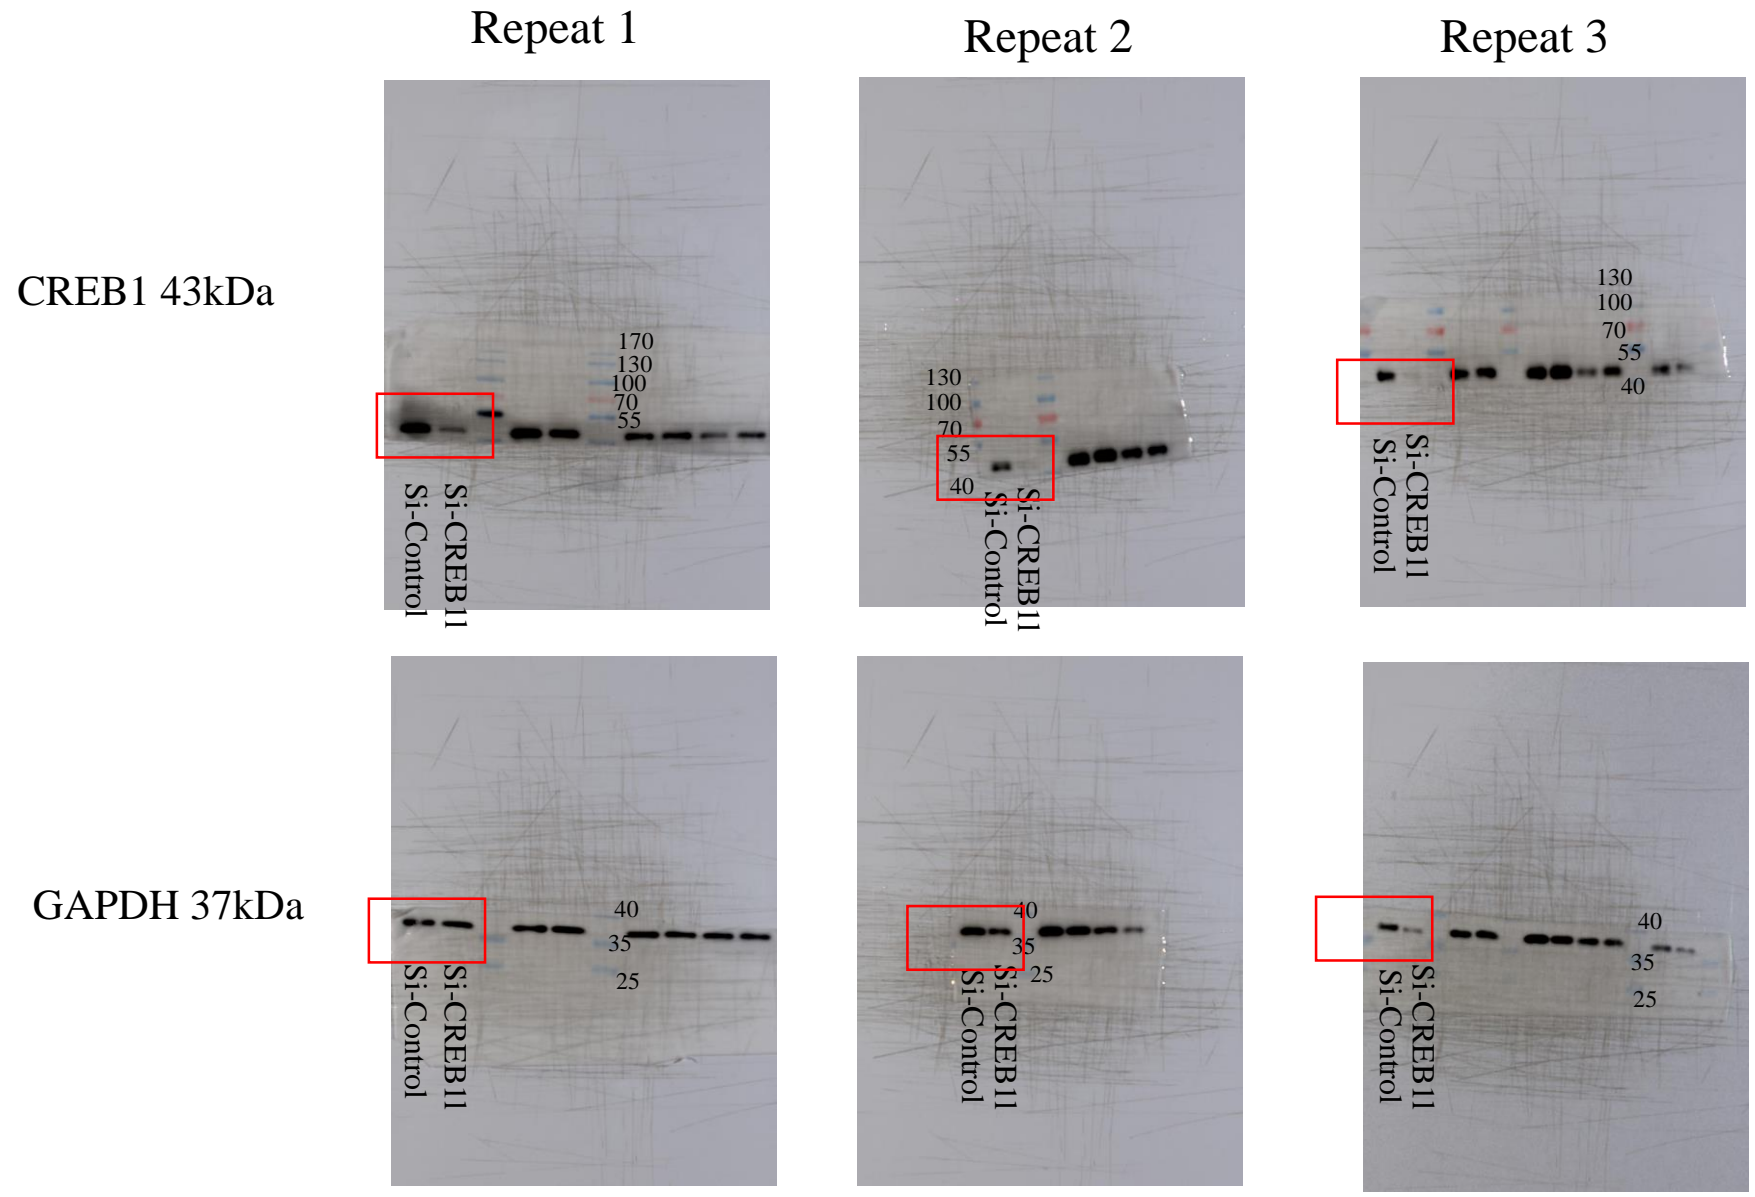

**Figure S1E. Expression of CREB1 were detected by western blot for three repeats**

CREB1 43kDa

Repeat 1

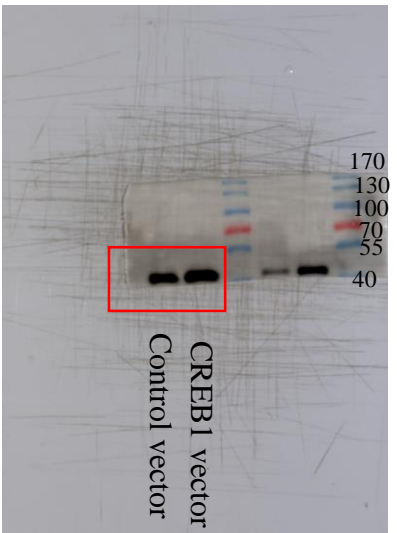

Repeat 2

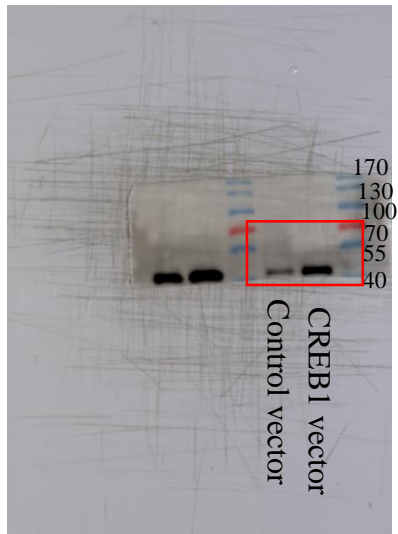

Repeat 3

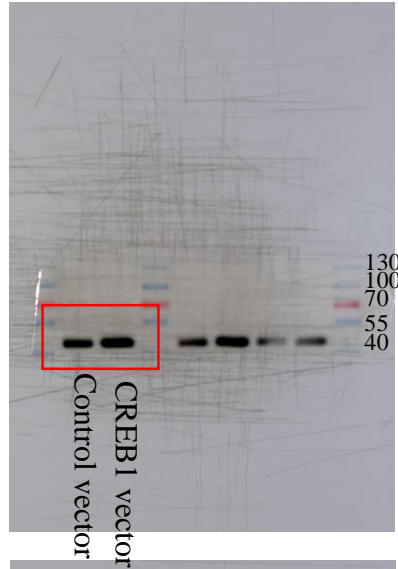

GAPDH 37kDa

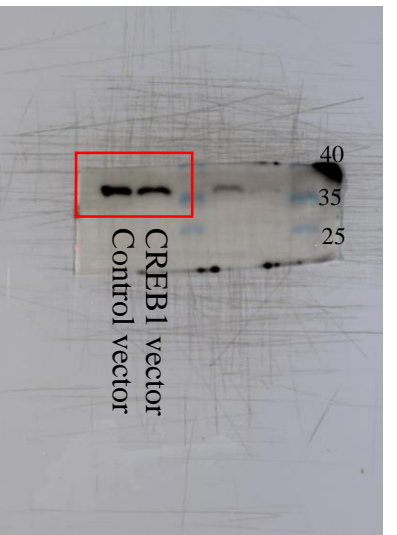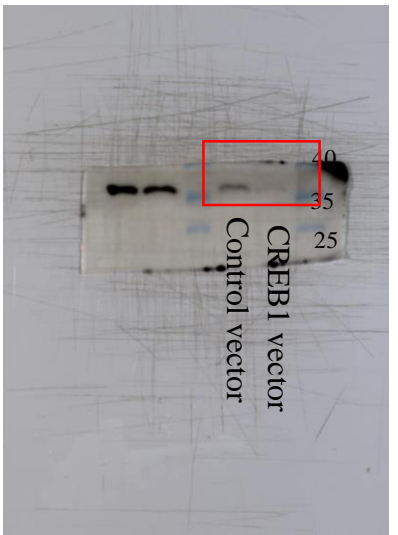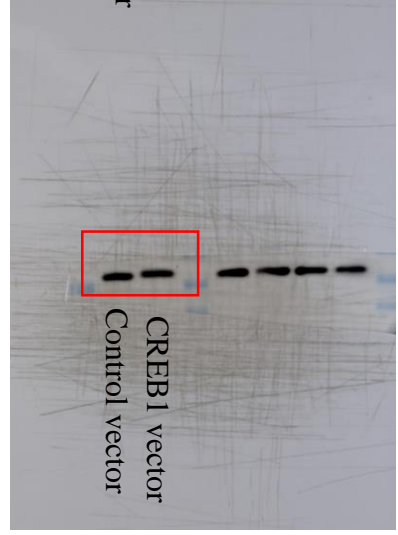

Supplement: 12890_2022_2272_MOESM2_ESM.pdf [file 12890_2022_2272_MOESM2_ESM.pdf]
